# Supplementary material
Source: PubMed Central journal article supplement (PMC3135941)
Supplement: supp_pp.111.177030_Rv2Fig.S2.pdf [file supp_pp.111.177030_Rv2Fig.S2.pdf]

Figure S2.

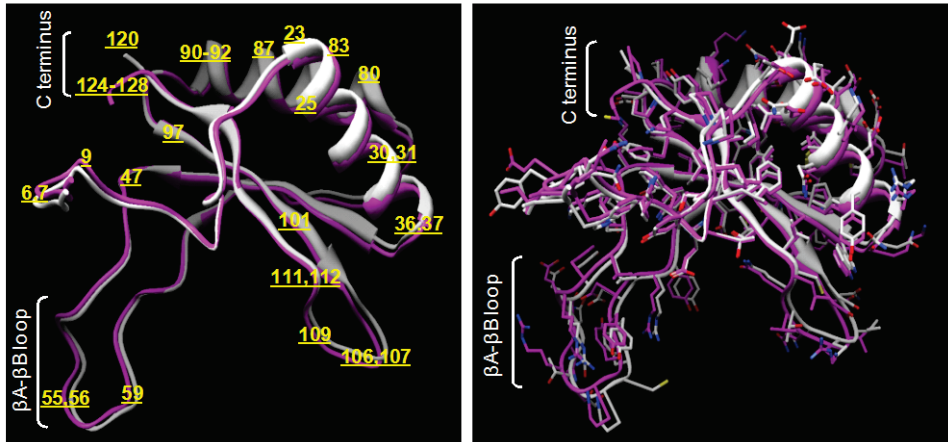

Figure S2. Structural comparison of RbcS from rice and sorghum. A homology model of sorghum RbcS (grey) was generated by using the SWISS-MODEL internet server (Arnold et al, 2006) based on the structure of rice RbcS (Uniprot AC No. 1wdd; purple). Ribbon diagrams with (right panel) or without amino acid residues (left panel) are shown. In the left panel, the positions of different amino acid between rice and sorghum are shown as numbers in yellow. The central solvent channel of Rubisco is in front of the structures. According to the structure of Rubisco (Knight et al. 1990), C-terminus of RbcS is located on the surface of holoenzyme.
